# Supplementary material for: Drought, Low Nitrogen Stress, and Ultraviolet-B Radiation Effects on Growth, Development, and Physiology of Sweetpotato Cultivars during Early Season
Source: MDPI journal article supplement (doi:10.3390/genes13010156), 2022-01-16
Supplement: s1 [file s1]

## Supplementary Material

**Table S1.** Analysis of variance means of physiological and gas-exchange traits of 10 sweetpotato cultivars measured at 20 days after planting under control, drought (DS), ultraviolet-B (UV-B) radiation, and low-nitrogen (LN) stress conditions.

| Trait                     | Unit                                     | Treatment | Beauregard<br>B-63 | Orleans<br>ns | NC051<br>98 | Bonita | Beauregard<br>B-14 | Vardaman | O'Henry | Evangelina | Travis | Covington |
|---------------------------|------------------------------------------|-----------|--------------------|---------------|-------------|--------|--------------------|----------|---------|------------|--------|-----------|
| Chlorophyll               | $\mu\text{g cm}^{-2}$                    | Control   | 19.4               | 22.6          | 21.5        | 18.0   | 22.2               | 22.2     | 23.0    | 23.7       | 24.0   | 18.5      |
|                           |                                          | DS        | 24.7               | 27.7          | 25.4        | 28.9   | 25.4               | 23.7     | 29.0    | 26.1       | 24.9   | 28.3      |
|                           |                                          | LN        | 23.0               | 23.5          | 21.8        | 20.2   | 22.7               | 23.3     | 21.6    | 22.1       | 24.8   | 21.8      |
|                           |                                          | UV-B      | 34.4               | 34.8          | 23.9        | 28.2   | 31.6               | 23.3     | 28.7    | 27.7       | 27.2   | 30.0      |
| Flavonoids                |                                          | Control   | 0.90               | 0.46          | 0.53        | 0.78   | 0.61               | 0.68     | 0.74    | 0.80       | 0.82   | 0.76      |
|                           |                                          | DS        | 0.95               | 0.91          | 0.83        | 0.76   | 0.89               | 0.67     | 0.67    | 0.74       | 0.64   | 0.76      |
|                           |                                          | LN        | 0.97               | 1.31          | 0.88        | 0.83   | 1.03               | 0.94     | 0.98    | 0.88       | 0.89   | 0.84      |
|                           |                                          | UV-B      | 1.11               | 1.31          | 0.98        | 1.01   | 1.09               | 1.09     | 1.44    | 0.78       | 1.29   | 1.26      |
| Anthocyanin               |                                          | Control   | 0.16               | 0.11          | 0.11        | 0.16   | 0.11               | 0.11     | 0.10    | 0.41       | 0.14   | 0.17      |
|                           |                                          | DS        | 0.13               | 0.09          | 0.11        | 0.11   | 0.12               | 0.15     | 0.09    | 0.33       | 0.11   | 0.14      |
|                           |                                          | LN        | 0.17               | 0.17          | 0.14        | 0.23   | 0.18               | 0.13     | 0.14    | 0.22       | 0.12   | 0.21      |
|                           |                                          | UV-B      | 0.06               | 0.06          | 0.12        | 0.08   | 0.07               | 0.12     | 0.09    | 0.13       | 0.10   | 0.09      |
| NBI                       |                                          | Control   | 24.0               | 57.2          | 48.0        | 23.5   | 39.7               | 32.9     | 31.7    | 32.0       | 31.2   | 24.8      |
|                           |                                          | DS        | 28.0               | 30.5          | 30.6        | 39.7   | 28.4               | 35.4     | 46.4    | 37.6       | 45.4   | 39.0      |
|                           |                                          | LN        | 24.6               | 18.2          | 25.1        | 24.6   | 22.2               | 25.3     | 23.2    | 26.1       | 28.6   | 27.3      |
|                           |                                          | UV-B      | 31.5               | 27.2          | 28.1        | 31.5   | 29.8               | 21.8     | 20.7    | 39.3       | 21.4   | 24.0      |
| Photosynthesis            | $\mu\text{mol m}^{-2}\text{s}^{-1}$      | Control   | 32.2               | 29.6          | 31.8        | 32.7   | 34.0               | 33.1     | 31.9    | 31.1       | 34.9   | 30.7      |
|                           |                                          | DS        | 23.5               | 22.2          | 22.7        | 11.9   | 24.1               | 25.4     | 26.6    | 22.6       | 23.8   | 11.1      |
|                           |                                          | LN        | 28.5               | 33.2          | 26.6        | 31.2   | 27.6               | 29.6     | 25.4    | 28.5       | 30.6   | 26.7      |
|                           |                                          | UV-B      | 23.2               | 22.7          | 32.9        | 22.9   | 26.8               | 19.7     | 24.3    | 28.0       | 17.4   | 28.4      |
| Stomatal conductance      | $\text{mol m}^{-2}\text{s}^{-1}$         | Control   | 0.55               | 0.49          | 0.52        | 0.64   | 0.61               | 0.53     | 0.60    | 0.54       | 0.52   | 0.69      |
|                           |                                          | DS        | 0.39               | 0.34          | 0.35        | 0.21   | 0.37               | 0.47     | 0.37    | 0.31       | 0.31   | 0.21      |
|                           |                                          | LN        | 0.55               | 0.58          | 0.36        | 0.52   | 0.49               | 0.39     | 0.39    | 0.41       | 0.40   | 0.47      |
|                           |                                          | UV-B      | 0.43               | 0.40          | 0.70        | 0.37   | 0.49               | 0.30     | 0.43    | 0.78       | 0.30   | 0.51      |
| Transpiration             | $\text{H}_2\text{O m}^{-2}\text{s}^{-1}$ | Control   | 7.63               | 7.38          | 8.22        | 9.50   | 8.30               | 8.24     | 9.34    | 7.80       | 8.07   | 8.96      |
|                           |                                          | DS        | 7.22               | 6.56          | 6.41        | 4.62   | 6.99               | 7.72     | 6.92    | 6.49       | 6.40   | 4.67      |
|                           |                                          | LN        | 9.56               | 10.12         | 7.65        | 9.40   | 8.68               | 7.80     | 7.75    | 8.29       | 8.11   | 8.96      |
|                           |                                          | UV-B      | 7.11               | 6.58          | 9.60        | 6.67   | 7.62               | 5.61     | 7.33    | 9.90       | 5.40   | 8.05      |
| ETR                       | $\mu\text{mol m}^{-2}\text{s}^{-1}$      | Control   | 233                | 207           | 205         | 211    | 224                | 230      | 218     | 205        | 259    | 208       |
|                           |                                          | DS        | 189                | 198           | 175         | 120    | 190                | 180      | 223     | 162        | 200    | 110       |
|                           |                                          | LN        | 182                | 219           | 190         | 208    | 192                | 209      | 160     | 183        | 214    | 195       |
|                           |                                          | UV-B      | 199                | 193           | 214         | 178    | 222                | 170      | 191     | 203        | 140    | 204       |
| Ci/Ca                     |                                          | Control   | 0.74               | 0.71          | 0.72        | 0.77   | 0.75               | 0.72     | 0.76    | 0.74       | 0.70   | 0.79      |
|                           |                                          | DS        | 0.73               | 0.70          | 0.69        | 0.75   | 0.71               | 0.74     | 0.68    | 0.68       | 0.66   | 0.71      |
|                           |                                          | LN        | 0.76               | 0.74          | 0.67        | 0.72   | 0.71               | 0.66     | 0.69    | 0.69       | 0.66   | 0.74      |
|                           |                                          | UV-B      | 0.76               | 0.74          | 0.78        | 0.70   | 0.75               | 0.71     | 0.75    | 0.82       | 0.73   | 0.75      |
| Minimal fluorescence      |                                          | Control   | 76.1               | 84.1          | 77.0        | 73.4   | 73.9               | 77.1     | 73.8    | 76.1       | 78.3   | 78.6      |
|                           |                                          | DS        | 67.7               | 75.1          | 70.8        | 68.7   | 74.7               | 48.9     | 75.7    | 76.8       | 75.5   | 74.7      |
|                           |                                          | LN        | 538                | 539           | 552         | 547    | 532                | 566      | 598     | 580        | 554    | 534       |
|                           |                                          | UV-B      | 64.6               | 61.5          | 70.3        | 76.7   | 70.6               | 60.6     | 71.4    | 75.6       | 74.3   | 76.5      |
| Maximal fluorescence      |                                          | Control   | 174                | 189           | 171         | 153    | 166                | 181      | 161     | 161        | 197    | 177       |
|                           |                                          | DS        | 138                | 148           | 142         | 121    | 150                | 173      | 166     | 150        | 160    | 132       |
|                           |                                          | LN        | 1086               | 1222          | 1166        | 1178   | 1126               | 1320     | 1444    | 1263       | 1287   | 1116      |
|                           |                                          | UV-B      | 133                | 125           | 155         | 145    | 150                | 132      | 139     | 158        | 139    | 162       |
| Steady-state fluorescence |                                          | Control   | 110                | 126           | 115         | 101    | 107                | 116      | 106     | 110        | 117    | 119       |

|                    |         |      |      |       |       |      |      |      |       |       |       |
|--------------------|---------|------|------|-------|-------|------|------|------|-------|-------|-------|
| Quantum efficiency | DS      | 94   | 102  | 103   | 98    | 105  | 124  | 108  | 111   | 109   | 110   |
|                    | LN      | 785  | 811  | 827   | 804   | 796  | 896  | 1092 | 913   | 866   | 781   |
|                    | UV-B    | 89.6 | 85.8 | 103.0 | 103.7 | 97.8 | 97.7 | 96.5 | 108.2 | 108.1 | 109.5 |
|                    | Control | 0.56 | 0.55 | 0.55  | 0.51  | 0.55 | 0.57 | 0.54 | 0.53  | 0.60  | 0.56  |
|                    | DS      | 0.49 | 0.49 | 0.49  | 0.43  | 0.50 | 0.72 | 0.54 | 0.48  | 0.52  | 0.42  |
|                    | LN      | 0.50 | 0.56 | 0.52  | 0.53  | 0.53 | 0.57 | 0.58 | 0.54  | 0.57  | 0.52  |
|                    | UV-B    | 0.50 | 0.49 | 0.55  | 0.47  | 0.52 | 0.54 | 0.48 | 0.52  | 0.46  | 0.52  |

**Table S2.** Analysis of variance means of shoot and root developmental and biomass-related traits of 10 sweetpotato cultivars measured at 20 days after planting under control, drought (DS), ultraviolet-B (UV-B) radiation, and low-nitrogen (LN) stress conditions.

| Trait             | Unit            | Treatment | Beauregard B-63 | Orleans | NC05198 | Bonita | Beauregard B-14 | Vardaman | O'Henry | Evangelina | Travis | Covington |
|-------------------|-----------------|-----------|-----------------|---------|---------|--------|-----------------|----------|---------|------------|--------|-----------|
| Vine length       | cm              | Control   | 39.3            | 39.9    | 20.9    | 55.8   | 27.9            | 36.1     | 60.0    | 32.0       | 34.5   | 16.6      |
|                   |                 | DS        | 36.5            | 26.3    | 11.6    | 22.6   | 40.9            | 16.5     | 41.0    | 42.5       | 19.8   | 18.0      |
|                   |                 | LN        | 51.3            | 30.1    | 12.9    | 35.4   | 57.3            | 22.5     | 32.6    | 21.8       | 23.9   | 26.6      |
|                   |                 | UV-B      | 45.5            | 33.9    | 11.1    | 38.3   | 47.0            | 21.8     | 59.1    | 66.0       | 33.5   | 32.3      |
| Leaf number       | no./plant       | Control   | 10.00           | 9.00    | 9.25    | 11.00  | 7.25            | 10.75    | 11.00   | 9.00       | 8.25   | 8.25      |
|                   |                 | DS        | 8.25            | 8.25    | 6.50    | 6.75   | 8.25            | 6.25     | 8.00    | 9.25       | 6.75   | 6.50      |
|                   |                 | LN        | 9.50            | 9.25    | 7.50    | 8.75   | 10.25           | 7.00     | 7.25    | 8.00       | 7.75   | 8.00      |
|                   |                 | UV-B      | 10.50           | 10.50   | 8.00    | 10.25  | 9.50            | 8.50     | 11.25   | 13.25      | 10.00  | 9.25      |
| Leaf area         | cm <sup>2</sup> | Control   | 520             | 747     | 928     | 1055   | 530             | 799      | 672     | 557        | 704    | 586       |
|                   |                 | DS        | 407             | 504     | 546     | 621    | 389             | 417      | 506     | 505        | 571    | 278       |
|                   |                 | LN        | 550             | 670     | 687     | 929    | 494             | 556      | 412     | 410        | 818    | 473       |
|                   |                 | UV-B      | 472             | 754     | 741     | 805    | 453             | 535      | 536     | 749        | 872    | 715       |
| Leaf dry weight   | g/plant         | Control   | 2.22            | 2.50    | 3.63    | 4.05   | 1.89            | 3.19     | 2.66    | 1.76       | 2.65   | 2.47      |
|                   |                 | DS        | 1.64            | 1.72    | 1.95    | 2.10   | 1.36            | 1.43     | 1.81    | 1.66       | 1.86   | 1.27      |
|                   |                 | LN        | 2.24            | 3.22    | 3.08    | 4.13   | 2.12            | 2.38     | 1.70    | 1.72       | 3.64   | 2.26      |
|                   |                 | UV-B      | 2.03            | 3.17    | 2.99    | 3.12   | 1.78            | 2.20     | 2.53    | 3.04       | 3.43   | 2.80      |
| Total root length | cm              | Control   | 5188            | 5581    | 5513    | 4537   | 4560            | 4820     | 5250    | 3871       | 4463   | 5463      |
|                   |                 | DS        | 3695            | 4364    | 3450    | 3483   | 3612            | 2540     | 4448    | 3158       | 3170   | 2748      |
|                   |                 | LN        | 5949            | 5506    | 6614    | 6796   | 6061            | 4053     | 5462    | 5097       | 6370   | 5848      |
|                   |                 | UV-B      | 5301            | 5501    | 5073    | 5117   | 4740            | 3626     | 5067    | 5601       | 3698   | 5469      |
| Root surface area | cm <sup>2</sup> | Control   | 825             | 870     | 927     | 957    | 653             | 883      | 871     | 584        | 790    | 1006      |
|                   |                 | DS        | 582             | 753     | 543     | 675    | 551             | 437      | 718     | 454        | 528    | 498       |
|                   |                 | LN        | 1023            | 1242    | 1036    | 1497   | 919             | 680      | 776     | 689        | 1236   | 970       |
|                   |                 | UV-B      | 746             | 889     | 752     | 821    | 655             | 562      | 740     | 923        | 633    | 950       |
| Root diameter     | mm              | Control   | 0.50            | 0.50    | 0.54    | 0.67   | 0.45            | 0.58     | 0.53    | 0.47       | 0.56   | 0.58      |
|                   |                 | DS        | 0.50            | 0.55    | 0.50    | 0.61   | 0.49            | 0.54     | 0.51    | 0.46       | 0.54   | 0.57      |
|                   |                 | LN        | 0.54            | 0.73    | 0.49    | 0.70   | 0.48            | 0.52     | 0.45    | 0.43       | 0.61   | 0.53      |
|                   |                 | UV-B      | 0.45            | 0.51    | 0.47    | 0.51   | 0.44            | 0.49     | 0.47    | 0.51       | 0.55   | 0.54      |
| Root volume       | cm <sup>3</sup> | Control   | 10.55           | 10.81   | 12.45   | 16.87  | 7.47            | 12.96    | 11.51   | 7.05       | 11.16  | 15.16     |
|                   |                 | DS        | 7.31            | 10.40   | 6.83    | 10.48  | 6.75            | 6.02     | 9.30    | 5.20       | 7.02   | 7.25      |
|                   |                 | LN        | 14.3            | 22.6    | 13.2    | 26.7   | 11.3            | 9.09     | 8.88    | 7.41       | 19.4   | 12.9      |
|                   |                 | UV-B      | 8.37            | 11.5    | 8.90    | 10.5   | 7.23            | 6.93     | 8.64    | 12.2       | 8.66   | 13.2      |
| Root tips         | no./plant       | Control   | 6774            | 7432    | 7480    | 6233   | 7313            | 6637     | 5725    | 4403       | 7143   | 6186      |
|                   |                 | DS        | 5638            | 6054    | 5149    | 5228   | 7113            | 4367     | 7031    | 4858       | 5599   | 5153      |
|                   |                 | LN        | 8911            | 8379    | 13474   | 11182  | 14103           | 5983     | 10863   | 9180       | 10233  | 9885      |
|                   |                 | UV-B      | 7865            | 8176    | 7659    | 8721   | 7172            | 7664     | 6353    | 6003       | 5715   | 6274      |

|                     |           |         |       |       |       |       |       |       |       |       |       |       |
|---------------------|-----------|---------|-------|-------|-------|-------|-------|-------|-------|-------|-------|-------|
| Root forks          | no./plant | Control | 46873 | 54669 | 54022 | 44726 | 35413 | 38463 | 56885 | 28866 | 36028 | 48995 |
|                     |           | DS      | 24642 | 28514 | 18764 | 19280 | 23725 | 12049 | 28971 | 18868 | 17942 | 15680 |
|                     |           | LN      | 56066 | 59179 | 61925 | 76503 | 53353 | 27730 | 46459 | 39565 | 56793 | 46192 |
|                     |           | UV-B    | 40751 | 57298 | 44278 | 42770 | 32854 | 21656 | 41032 | 48683 | 22029 | 41917 |
| Root crossing<br>s  | no./plant | Control | 4238  | 4994  | 4515  | 2547  | 3532  | 2792  | 4682  | 2693  | 2782  | 3752  |
|                     |           | DS      | 2226  | 2329  | 1859  | 1453  | 2106  | 1080  | 2490  | 1944  | 1566  | 1187  |
|                     |           | LN      | 4303  | 3474  | 5658  | 4335  | 4701  | 2326  | 4301  | 4058  | 3835  | 3669  |
|                     |           | UV-B    | 4307  | 4740  | 4343  | 3716  | 3424  | 2138  | 4076  | 3836  | 1934  | 3663  |
| Stem dry weight     | g/plant   | Control | 1.88  | 2.23  | 2.31  | 3.64  | 1.48  | 2.02  | 2.69  | 1.24  | 2.09  | 1.78  |
|                     |           | DS      | 1.72  | 1.75  | 1.40  | 1.84  | 1.35  | 1.02  | 2.17  | 1.44  | 1.69  | 1.18  |
|                     |           | LN      | 1.93  | 2.45  | 1.77  | 2.84  | 1.57  | 1.26  | 1.49  | 0.95  | 2.11  | 1.39  |
|                     |           | UV-B    | 1.67  | 2.52  | 1.78  | 2.61  | 1.63  | 1.37  | 2.20  | 2.26  | 2.41  | 2.26  |
| Root dry weight     | g/plant   | Control | 1.27  | 1.10  | 1.49  | 1.64  | 0.80  | 1.19  | 1.25  | 0.63  | 1.09  | 1.58  |
|                     |           | DS      | 1.24  | 1.62  | 1.28  | 1.61  | 0.98  | 0.62  | 1.41  | 0.82  | 1.04  | 0.98  |
|                     |           | LN      | 1.52  | 2.67  | 1.78  | 2.82  | 1.21  | 0.85  | 0.92  | 0.78  | 1.72  | 1.29  |
|                     |           | UV-B    | 0.89  | 1.46  | 1.14  | 1.20  | 0.70  | 0.68  | 1.11  | 1.21  | 0.93  | 1.36  |
| Root to shoot ratio |           | Control | 0.31  | 0.23  | 0.25  | 0.21  | 0.24  | 0.23  | 0.23  | 0.21  | 0.23  | 0.37  |
|                     |           | DS      | 0.37  | 0.47  | 0.38  | 0.41  | 0.36  | 0.25  | 0.36  | 0.26  | 0.29  | 0.40  |
|                     |           | LN      | 0.36  | 0.47  | 0.37  | 0.41  | 0.33  | 0.23  | 0.29  | 0.29  | 0.30  | 0.35  |
|                     |           | UV-B    | 0.24  | 0.26  | 0.24  | 0.21  | 0.21  | 0.19  | 0.23  | 0.23  | 0.16  | 0.27  |
| Storage root number | no./plant | Control | 9.75  | 9.25  | 7.75  | 3.75  | 10.0  | 4.75  | 3.00  | 8.33  | 2.75  | 12.25 |
|                     |           | DS      | 4.75  | 6.25  | 6.50  | 6.25  | 4.00  | 5.00  | 6.50  | 5.75  | 5.00  | 8.50  |
|                     |           | LN      | 7.50  | 12.25 | 8.50  | 9.00  | 6.50  | 4.00  | 5.00  | 6.00  | 9.25  | 9.50  |
|                     |           | UV-B    | 9.00  | 11.00 | 7.25  | 5.50  | 7.25  | 3.50  | 3.25  | 10.75 | 4.25  | 11.75 |
